# Supplementary material
Source: publisher site journal article supplement (https://www.dovepress.com/article/264188)
Supplement: Supplementary file 1 [file get_supplementary_file.php]

**Supplementary Materials**

Supplementary 1. The index scores of musical stimuli

|  | Valence  (M±SD) | Arousal  (M±SD) | Dominance (M±SD) | Trend  (M±SD) | Familiarity (M±SD) |
| --- | --- | --- | --- | --- | --- |
| Happy | 7.554±0.512 | 7.107±0.921 | 7.508±0.476 | 7.252±0.755 | 3.568±0.522 |
| Neutral | 6.311±1.008 | 5.552±1.363 | 6.23±1.030 | 6.359±1.157 | 3.76±0.854 |
| Sad | 3.843±0.676 | 4.277±0.080 | 4.646±0.707 | 4.467±0.742 | 2.738±0.109 |

Supplementary 2. The spectral amplitudes of the nonremission group at the O2 and P4 electrodes in the beta-2 (20-30 Hz) and gamma (30-45 Hz) bands (blue and red lines denote the condition of the nonremission group listening to music (Pain+Music) and the no sound (Pain) condition, respectively).


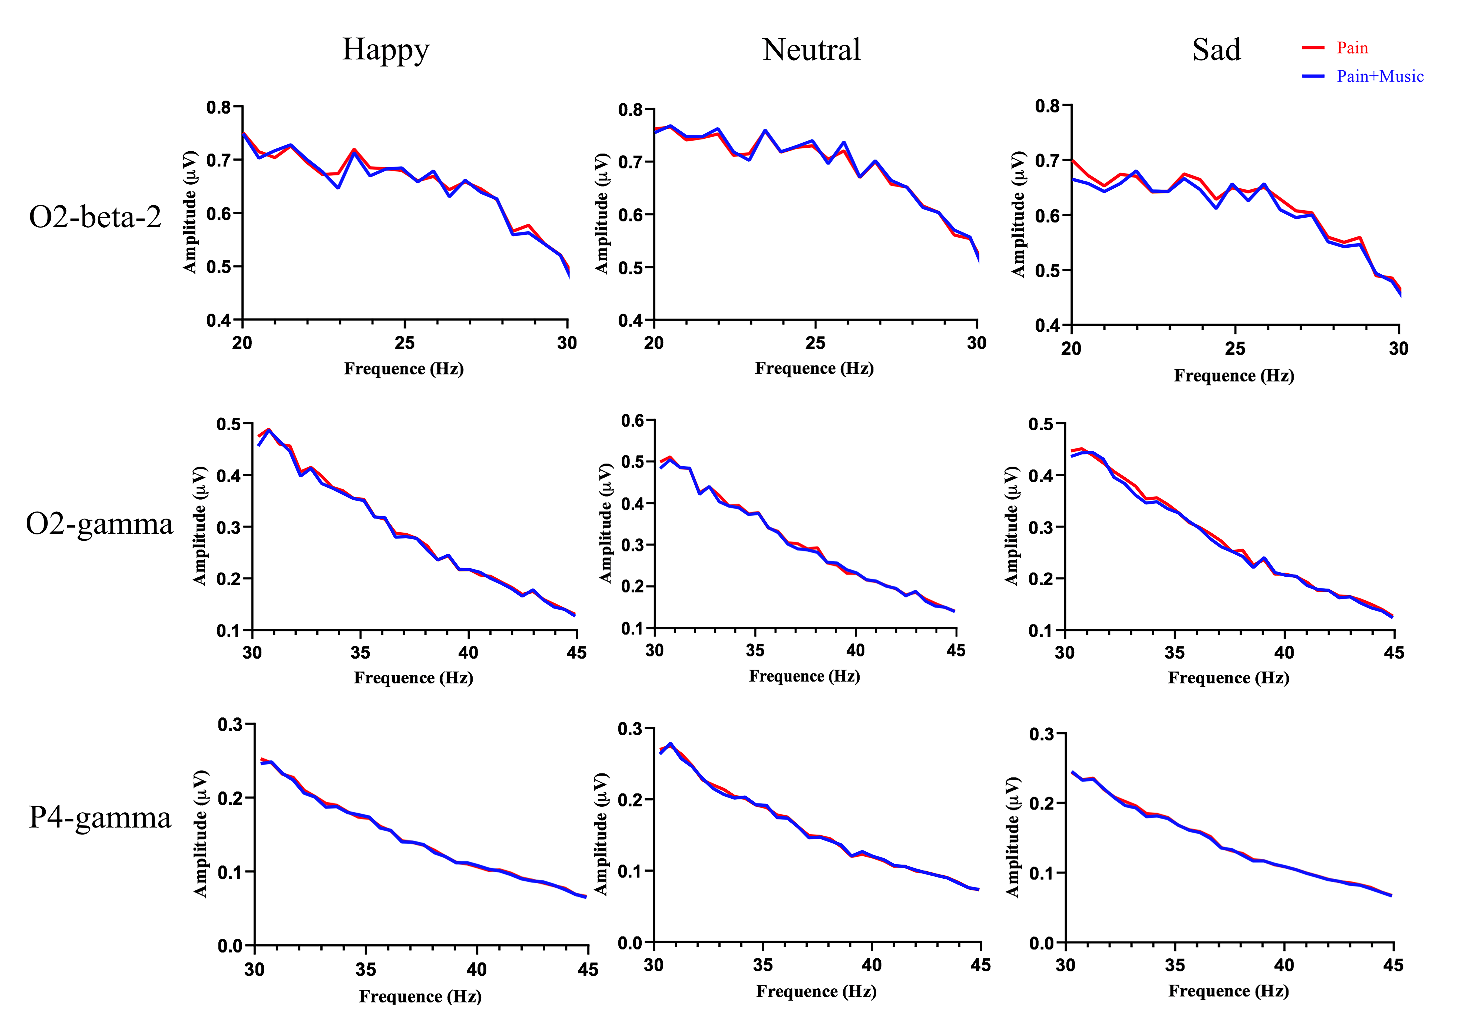


Supplementary 3. Correlation analysis between pain tolerance time and spectra amplitudes at the O2 and P4 electrodes in the beta-2 (20-30 Hz) and gamma (30-45 Hz) bands

|  |  |  | r | P |
| --- | --- | --- | --- | --- |
| O2-beta2 | remission | Pain | 0.502 | 0.024* |
|  |  | Pain+Sad Music | 0.350 | 0.130 |
|  | nonremission | Pain | -0.137 | 0.587 |
|  |  | Pain+Sad Music | -0.143 | 0.570 |
| O2-gamma | remission | Pain | 0.517 | 0.020* |
|  |  | Pain+Sad Music | 0.374 | 0.104 |
|  | nonremission | Pain | -0.143 | 0.570 |
|  |  | Pain+Sad Music | -0.220 | 0.381 |
| P4-gamma | remission | Pain | 0.608 | 0.004** |
|  |  | Pain+music | 0.475 | 0.034* |
|  | nonremission | Pain | 0.209 | 0.404 |
|  |  | Pain+Sad Music | 0.266 | 0.287 |

*, *p*<0.05; **, *p*<0.01

Supplementary 4. The spectral amplitudes of the remission group and nonremission group at the O2 and P4 electrodes in the beta-2 (20-30 Hz) and gamma (30-45 Hz) bands (blue and red lines denote the remission group and the nonremission group, respectively).


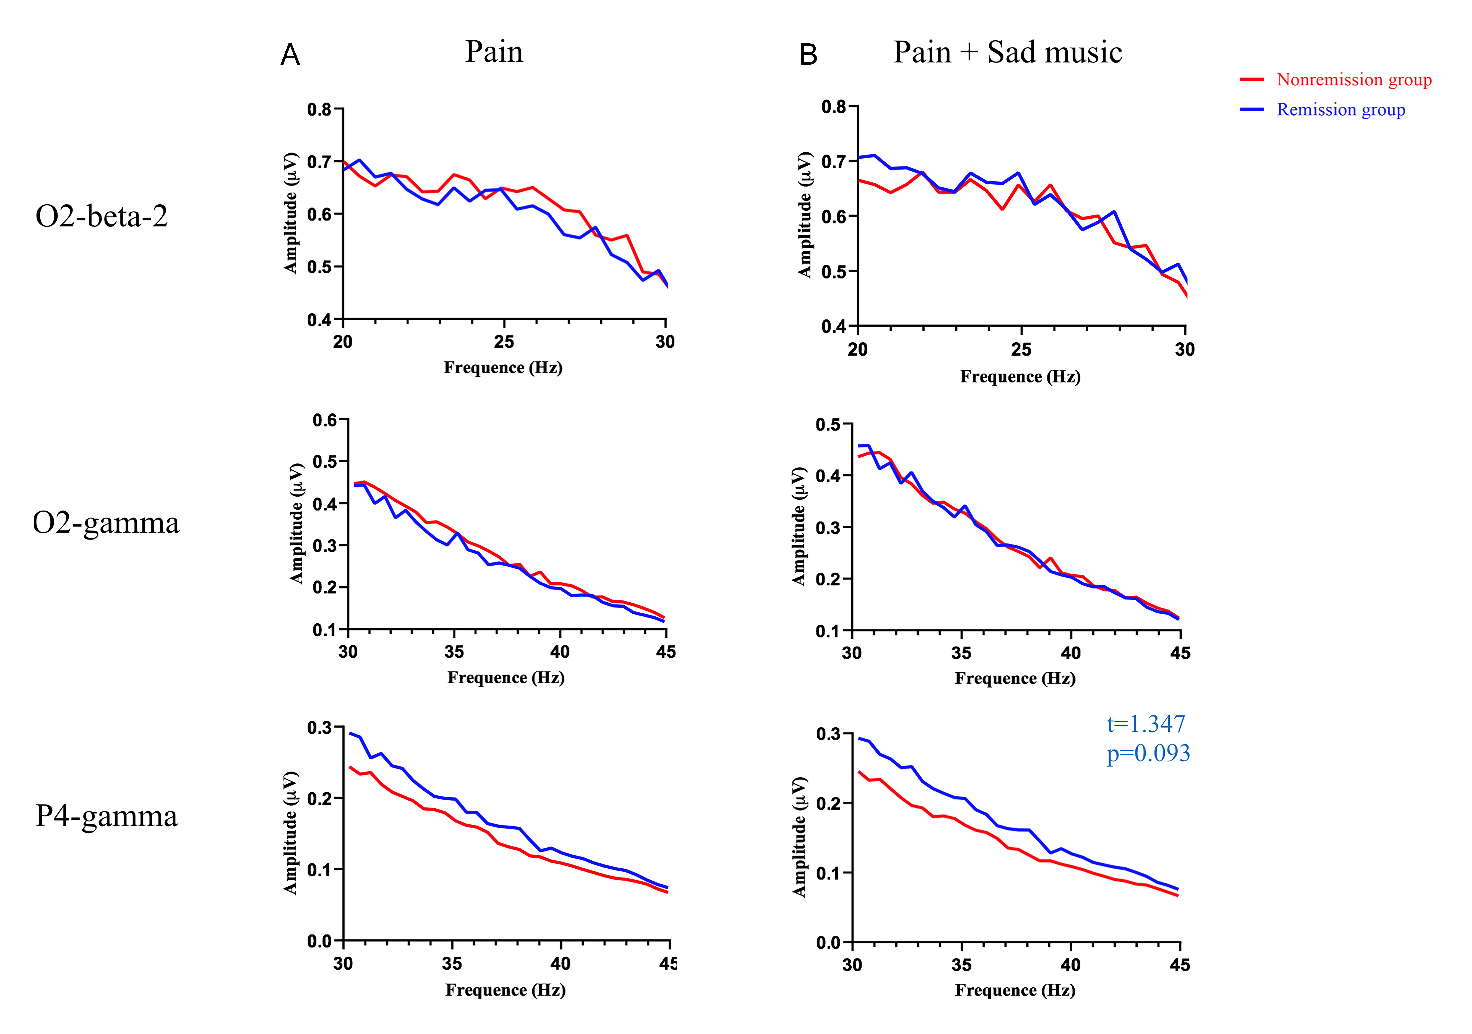


Supplementary 5. Difference analysis of personality trait scores between the remission group and the nonremission group

| 16PF personality factor | Remission group  (M±SD) | Nonremission group  (M±SD) | t | p |
| --- | --- | --- | --- | --- |
| A (Warmth) | 6.300±1.838 | 6.1111±2.055 | 0.299 | 0.767 |
| B (Reasoning) | 7.000±1.257 | 6.3333±1.847 | 1.312 | 0.198 |
| C (Emotional Stability) | 5.800±1.989 | 5.6667±2.196 | 0.196 | 0.845 |
| E (Dominance) | 5.750±1.410 | 6.3889±1.501 | -1.353 | 0.184 |
| F (Liveliness) | 6.950±1.791 | 7.6667±2.223 | -1.099 | 0.279 |
| G (Rule-Consciousness) | 5.800±2.016 | 5.0556±2.313 | 1.060 | 0.296 |
| H (Social Boldness) | 5.300±1.559 | 5.9444±1.552 | -1.275 | 0.211 |
| I (Sensitivity) | 4.800±1.881 | 4.7778±2.290 | 0.033 | 0.974 |
| L (Vigilance) | 4.400±1.847 | 5.2222±2.238 | -1.240 | 0.223 |
| M (Abstractedness) | 5.250±2.049 | 5.1667±1.917 | 0.129 | 0.898 |
| N (Privateness) | 7.300±1.720 | 6.6111±1.650 | 1.257 | 0.217 |
| O (Apprehension) | 5.900±1.483 | 5.3333±2.196 | 0.941 | 0.353 |
| Q1 (Openness to Change) | 7.350±1.755 | 7.2222±1.629 | 0.232 | 0.818 |
| Q2 (Self-Reliance) | 5.200±2.067 | 5.1111±1.641 | 0.146 | 0.885 |
| Q3 (Perfectionism) | 5.100±1.714 | 4.8333±1.689 | 0.482 | 0.633 |
| Q4 (Tension) | 5.600±1.603 | 5.2778±1.809 | 0.582 | 0.564 |
| X1 (Adaptation and Anxiety) | 5.430±1.567 | 5.2111±2.074 | 0.369 | 0.714 |
| X2 (Introvert and Extrovert)  X3 (Emotional use and Security alertness)  X4 (Coward and Decisive)  Y1 (Mental health factors)  Y2 (Professional achievers)  Y3 (Strong creative)  Y4 (Capable of growth in the new environment) | 6.275±1.949  6.410±2.065  5.845±1.451  23.250±5.458  58.950±10.475  78.850±8.869  21.950±2.874 | 7.0556±1.972  6.6222±2.510  6.1944±1.231  24.7222±6.322  55.8333±11.279  78.0000±6.306  19.5556±4.488 | -1.226  -0.286  -0.796  -0.770  0.883  0.337  1.979 | 0.228  0.777  0.431  0.446  0.383  0.738  1.979 |

Supplementary 6. Correlation analyses between personality trait scores and spectra amplitudes (Pain + Music)

| 16PF personality factor | M±SD | r | p |
| --- | --- | --- | --- |
| A (Warmth) | 6.300±1.838 | -0.122 | 0.609 |
| B (Reasoning) | 7.000±1.257 | -0.048 | 0.842 |
| C (Emotional Stability) | 5.800±1.989 | -0.270 | 0.249 |
| E (Dominance) | 5.750±1.410 | -0.467 | 0.038* |
| F (Liveliness) | 6.950±1.791 | -0.509 | 0.022* |
| G (Rule-Consciousness) | 5.800±2.016 | -0.034 | 0.887 |
| H (Social Boldness) | 5.300±1.559 | -0.295 | 0.207 |
| I (Sensitivity) | 4.800±1.881 | 0.242 | 0.304 |
| L (Vigilance) | 4.400±1.847 | 0.203 | 0.391 |
| M (Abstractedness) | 5.250±2.049 | 0.036 | 0.879 |
| N (Privateness) | 7.300±1.720 | -0.194 | 0.413 |
| O (Apprehension) | 5.900±1.483 | 0.154 | 0.516 |
| Q1 (Openness to Change) | 7.350±1.755 | 0.062 | 0.795 |
| Q2 (Self-Reliance) | 5.200±2.067 | 0.279 | 0.233 |
| Q3 (Perfectionism) | 5.100±1.714 | 0.202 | 0.394 |
| Q4 (Tension) | 5.600±1.603 | 0.230 | 0.328 |
| X1 (Adaptation and Anxiety) | 5.430±1.567 | 0.239 | 0.309 |
| X2 (Introvert and Extrovert)  X3 (Emotional use and Security alertness)  X4 (Coward and Decisive)  Y1 (Mental health factors)  Y2 (Professional achievers)  Y3 (Strong creative)  Y4 (Capable of growth in the new environment) | 6.275±1.949  6.410±2.065  5.845±1.451  23.250±5.458  58.950±10.475  78.850±8.869  21.950±2.874 | -0.489  -0.333  0.079  -0.375  -0.121  0.408  0.393 | 0.029*  0.152  0.741  0.103  0.611  0.074  0.086 |

*, *p*<0.05

Supplementary 7. Correlation analyses between personality trait scores and spectra amplitudes (Pain)

| 16PF personality factor | M±SD | r | p |
| --- | --- | --- | --- |
| A (Warmth) | 6.300±1.838 | -0.102 | 0.669 |
| B (Reasoning) | 7.000±1.257 | -0.031 | 0.898 |
| C (Emotional Stability) | 5.800±1.989 | -0.277 | 0.236 |
| E (Dominance) | 5.750±1.410 | -0.477 | 0.034* |
| F (Liveliness) | 6.950±1.791 | -0.486 | 0.030* |
| G (Rule-Consciousness) | 5.800±2.016 | -0.045 | 0.852 |
| H (Social Boldness) | 5.300±1.559 | -0.296 | 0.205 |
| I (Sensitivity) | 4.800±1.881 | 0.266 | 0.257 |
| L (Vigilance) | 4.400±1.847 | 0.176 | 0.459 |
| M (Abstractedness) | 5.250±2.049 | 0.029 | 0.902 |
| N (Privateness) | 7.300±1.720 | -0.164 | 0.490 |
| O (Apprehension) | 5.900±1.483 | 0.154 | 0.517 |
| Q1 (Openness to Change) | 7.350±1.755 | 0.015 | 0.950 |
| Q2 (Self-Reliance) | 5.200±2.067 | 0.270 | 0.249 |
| Q3 (Perfectionism) | 5.100±1.714 | 0.226 | 0.337 |
| Q4 (Tension) | 5.600±1.603 | 0.229 | 0.331 |
| X1 (Adaptation and Anxiety) | 5.430±1.567 | 0.237 | 0.315 |
| X2 (Introvert and Extrovert)  X3 (Emotional use and Security alertness)  X4 (Coward and Decisive)  Y1 (Mental health factors)  Y2 (Professional achievers)  Y3 (Strong creative)  Y4 (Capable of growth in the new environment) | 6.275±1.949  6.410±2.065  5.845±1.451  23.250±5.458  58.950±10.475  78.850±8.869  21.950±2.874 | -0.477  -0.345  0.039  -0.370  -0.113  0.382  0.393 | 0.033*  0.136  0.869  0.108  0.635  0.096  0.086 |

*, *p*<0.05
